# Supplementary material for: Genome-Wide Association Study of Peripheral Arterial Disease in a Japanese Population
Source: PubMed Central journal article supplement (PMC4619060; doi:10.1371/journal.pone.0139262), 2015-10-21

**a**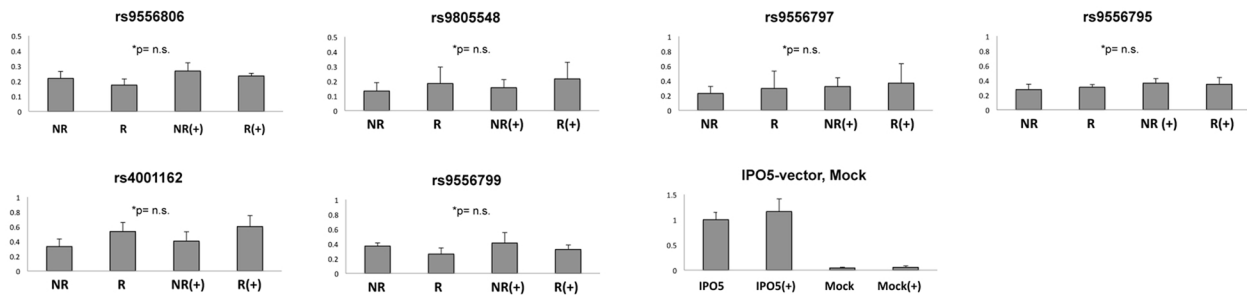**b**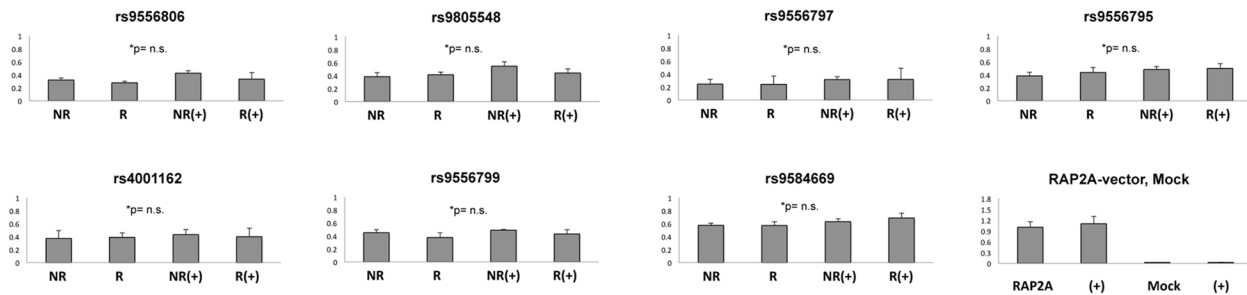

Supplement: pone.0139262.s003.pdf [file pone.0139262.s003.pdf]
